# Supplementary material for: Antitumoral effect of Ocoxin on acute myeloid leukemia
Source: PubMed Central journal article supplement (PMC4868752; doi:10.18632/oncotarget.6862), 2016-01-09
Supplement: oncotarget-07-6231-s001.pdf [file oncotarget-07-6231-s001.pdf]

## SUPPLEMENTARY TABLE AND FIGURE

**Supplementary Table S1: In vivo effect of OOS on gene expression profiles.** The gene expression profile of three control tumors was compared to that of three tumors treated with 100  $\mu$ l of OOS. A list with those genes whose expression changed above 1.5 times with the treatment is shown in the table.

See Supplementary table 1

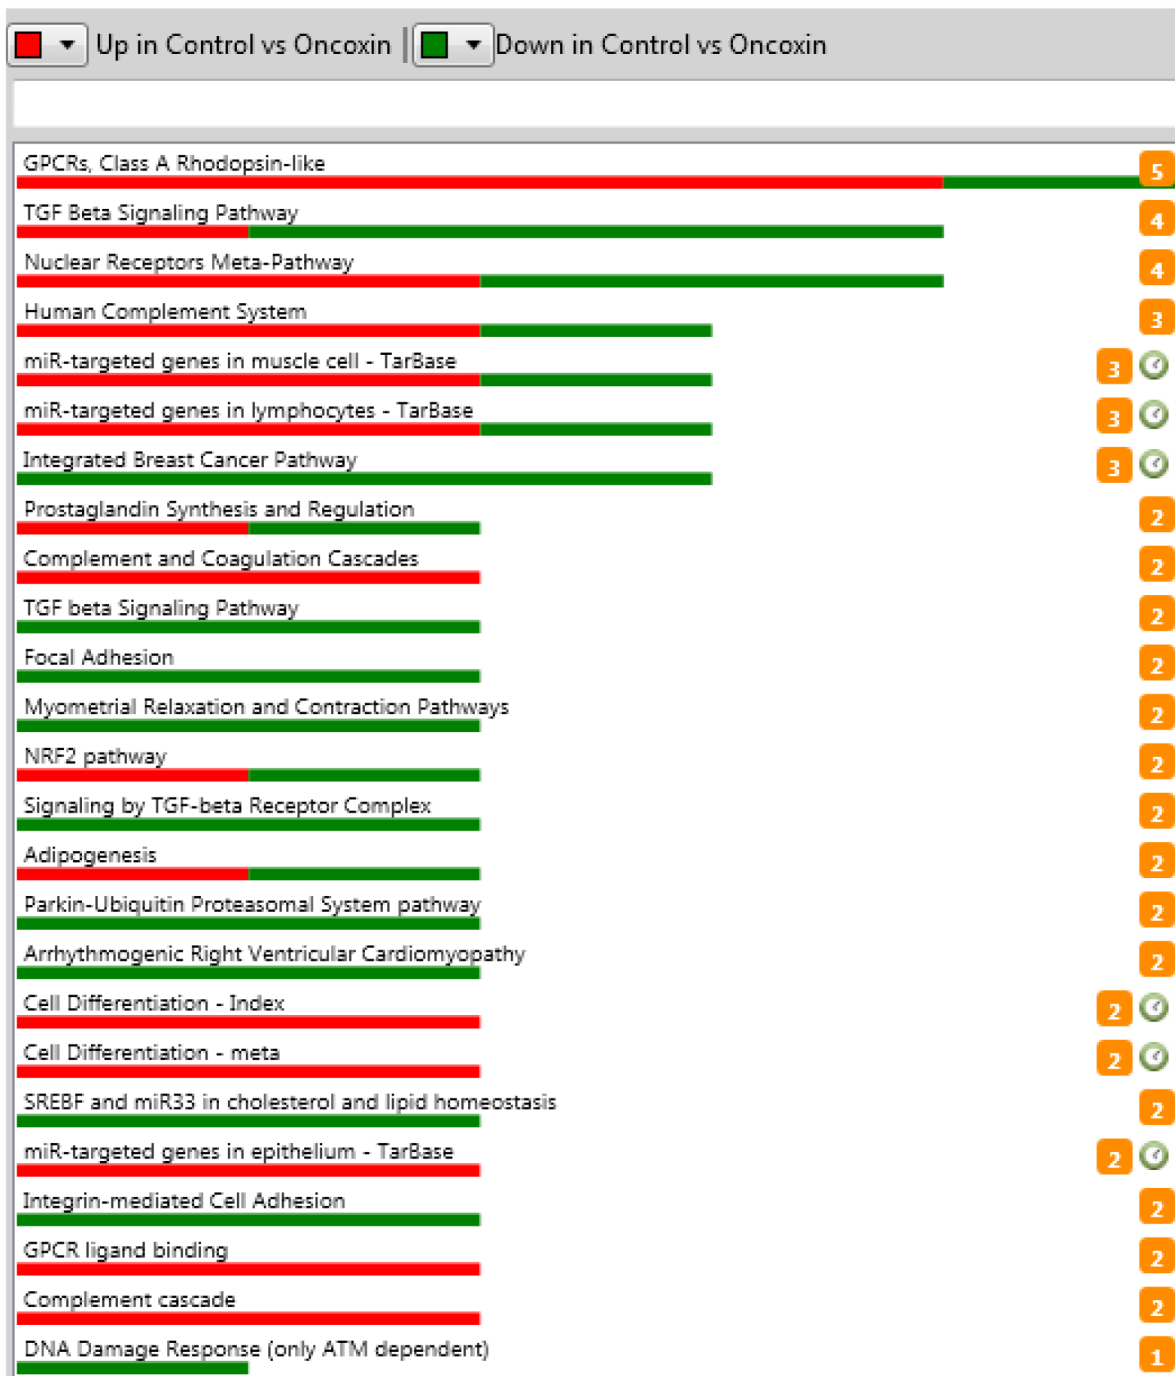

(Continued)

| <input type="checkbox"/> Up in Control vs Oncoxin                                          | <input type="checkbox"/> Down in Control vs Oncoxin |
|--------------------------------------------------------------------------------------------|-----------------------------------------------------|
| <input type="checkbox"/> Metapathway biotransformation                                     | 1                                                   |
| <input type="checkbox"/> Senescence and Autophagy in Cancer                                | 1                                                   |
| <input type="checkbox"/> Notch Signaling Pathway                                           | 1                                                   |
| <input type="checkbox"/> Calcium Regulation in the Cardiac Cell                            | 1                                                   |
| <input type="checkbox"/> Endochondral Ossification                                         | 1                                                   |
| <input type="checkbox"/> Wnt Signaling Pathway                                             | 1                                                   |
| <input type="checkbox"/> Wnt Signaling Pathway and Pluripotency                            | 1                                                   |
| <input type="checkbox"/> Striated Muscle Contraction                                       | 1                                                   |
| <input type="checkbox"/> Fatty Acid Biosynthesis                                           | 1                                                   |
| <input type="checkbox"/> XBP1(S) activates chaperone genes                                 | 1                                                   |
| <input type="checkbox"/> EV release from cardiac cells and their functional effects        | 1                                                   |
| <input type="checkbox"/> Triacylglyceride Synthesis                                        | 1                                                   |
| <input type="checkbox"/> Nuclear Receptors in Lipid Metabolism and Toxicity                | 1                                                   |
| <input type="checkbox"/> Glucocorticoid Receptor Pathway                                   | 1                                                   |
| <input type="checkbox"/> Vitamin D Receptor Pathway                                        | 1                                                   |
| <input type="checkbox"/> Pregnane X Receptor pathway                                       | 1                                                   |
| <input type="checkbox"/> Constitutive Androstane Receptor Pathway                          | 1                                                   |
| <input type="checkbox"/> Liver X Receptor Pathway                                          | 1                                                   |
| <input type="checkbox"/> Apoptosis-related network due to altered Notch3 in ovarian cancer | 1                                                   |
| <input type="checkbox"/> Ectoderm Differentiation                                          | 1                                                   |
| <input type="checkbox"/> Mesodermal Commitment Pathway                                     | 1                                                   |
| <input type="checkbox"/> Dopaminergic Neurogenesis                                         | 1                                                   |
| <input type="checkbox"/> Amyotrophic lateral sclerosis (ALS) SOD1 - CHMP2B MODEL           | 1                                                   |
| <input type="checkbox"/> Hair Follicle Development: Cytodifferentiation (Part 3 of 3)      | 1                                                   |
| <input type="checkbox"/> Mammary gland development pathway - Puberty (Stage 2 of 4)        | 1                                                   |

(Continued)

|  Up in Control vs Oncoxin |  Down in Control vs Oncoxin |                                                                                                                      |
|------------------------------------------------------------------------------------------------------------|--------------------------------------------------------------------------------------------------------------|----------------------------------------------------------------------------------------------------------------------|
|                           |                                                                                                              | Regulation of Insulin-like Growth Factor (IGF) transport and uptake by Insulin-like Growth Factor Binding Prote... 1 |
|                           |                                                                                                              | Regulation of lipid metabolism by Peroxisome proliferator-activated receptor alpha (PPARalpha) 1                     |
|                           |                                                                                                              | Degradation of the extracellular matrix 1                                                                            |
|                           |                                                                                                              | Transcriptional activity of SMAD2/SMAD3:SMAD4 heterotrimer 1                                                         |
|                           |                                                                                                              | Activation of gene expression by SREBF (SREBP) 1                                                                     |
|                           |                                                                                                              | Primary Focal Segmental Glomerulosclerosis FSGS 1                                                                    |
|                           |                                                                                                              | Small Ligand GPCRs 1                                                                                                 |
|                           |                                                                                                              | Integrated Pancreatic Cancer Pathway 1                                                                               |
|                           |                                                                                                              | Corticotropin-releasing hormone 1                                                                                    |
|                           |                                                                                                              | Interleukin-11 Signaling Pathway 1                                                                                   |
|                           |                                                                                                              | B Cell Receptor Signaling Pathway 1                                                                                  |
|                           |                                                                                                              | Drug Induction of Bile Acid Pathway 1                                                                                |
|                           |                                                                                                              | Synaptic Vesicle Pathway 1                                                                                           |
|                           |                                                                                                              | Alzheimers Disease 1             |
|                           |                                                                                                              | SREBP signalling 1                                                                                                   |
|                           |                                                                                                              | Cholesterol Biosynthesis 1                                                                                           |
|                           |                                                                                                              | Signaling by EGFR 1                                                                                                  |
|                           |                                                                                                              | Neurotransmitter Release Cycle 1                                                                                     |
|                           |                                                                                                              | Immunoregulatory interactions between a Lymphoid and a non-Lymphoid cell 1                                           |
|                           |                                                                                                              | Factors involved in megakaryocyte development and platelet production 1                                              |
|                         |                                                                                                              | Cholesterol biosynthesis 1                                                                                           |
|                         |                                                                                                              | Cell surface interactions at the vascular wall 1                                                                     |
|                         |                                                                                                              | Bile acid and bile salt metabolism 1                                                                                 |
|                         |                                                                                                              | Codeine and Morphine Metabolism 1                                                                                    |
|                         |                                                                                                              | Nicotine Activity on Dopaminergic Neurons 1                                                                          |

(Continued)

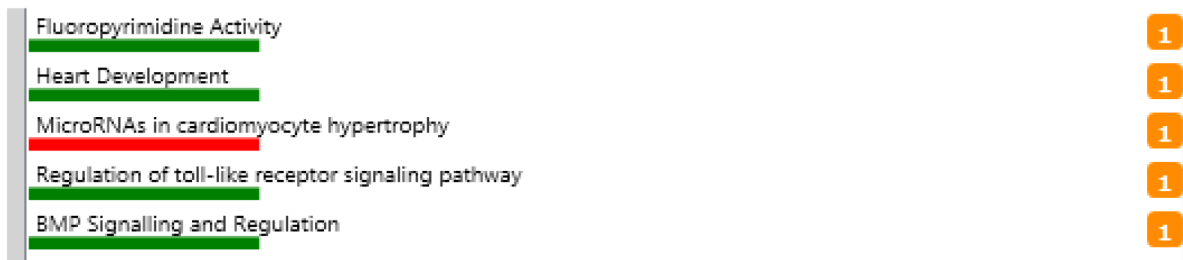

**Supplementary Figure S1: Pathways in vivo deregulated after OOS treatment.** Genes found to be deregulated at least 1.5 times in the Affimetrix Expression Console were analyzed with the same software to evaluate the pathways in which gene expression is altered. Below each altered pathway, genes upregulated in the control condition (red) or after OOS treatment (green), are shown. Besides, the total number of genes deregulated in a given pathway are shown in an orange box at the end of each line.
